# Supplementary material for: Superior UV-light photocatalysts of nano-crystalline (Ni or Co) FeWO4: structure, optical characterization and synthesis by a microemulsion method
Source: Royal Society of Chemistry journal article supplement (doi:10.1039/d0nj05431c), 2021-01-01
Supplement: d0nj05431c1.pdf [file d0nj05431c1.pdf]

## Supplementary Information

### **Superior UV- light photocatalysts of Nano-Crystalline (Ni or Co) FeWO<sub>4</sub>: Structure, Optical Characterization Synthesized by A Microemulsion Method**

**Sabah. M. Abdelbasir,\*# Ahmed Mourtada Elseman,\*#, Farid A. Harraz, Yasser MZ Ahmed, Said M. El-Sheikh\*, and Mohamed M. Rashad**

Central Metallurgical Research & Development Institute (CMRDI), P.O.Box 87 Helwan, 11421, Cairo, Egypt.

\*Corresponding author. (S. M. Abdelbasir) Email: sfoda20@hotmail.com (A. M. Elseman) Email: amourtada@cmrdi.sci.eg; and (S. M. El-Sheikh) Email: selsheikh2001@gmail.com

#These authors equally contributed to the work.

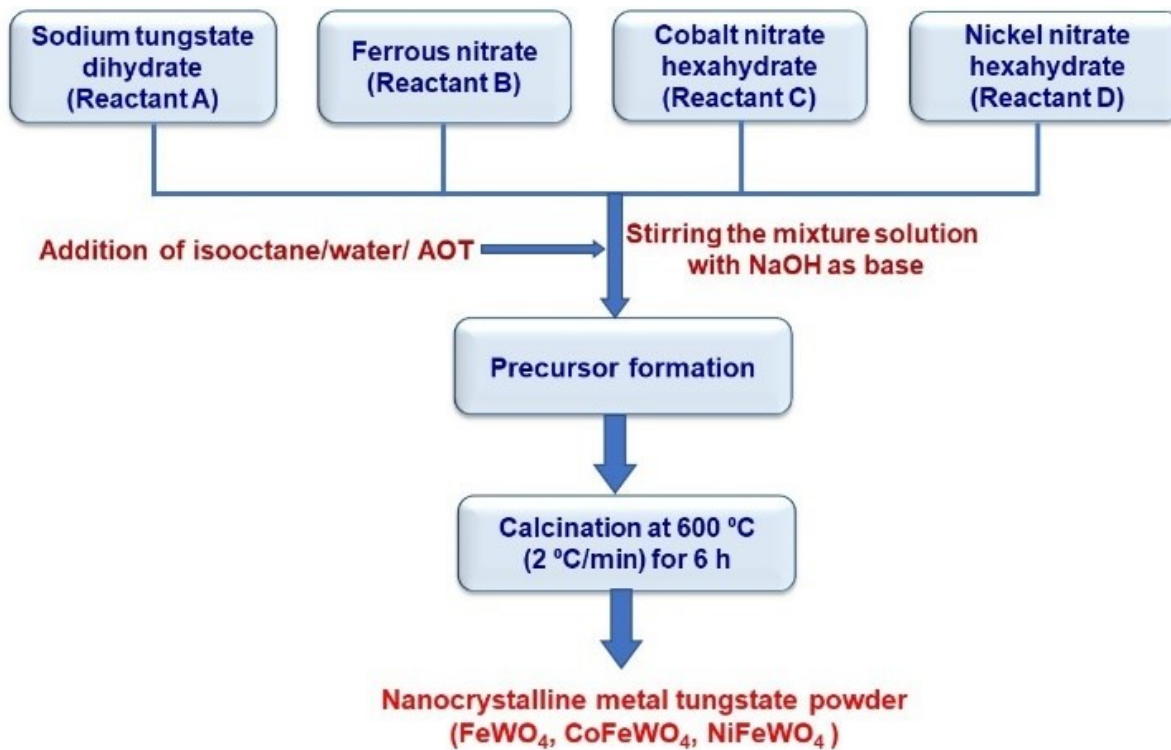

**Fig. S1.** Flow chart for the production of FeWO<sub>4</sub>, CoFeWO<sub>4</sub>, and NiFeWO<sub>4</sub> by microemulsion method.

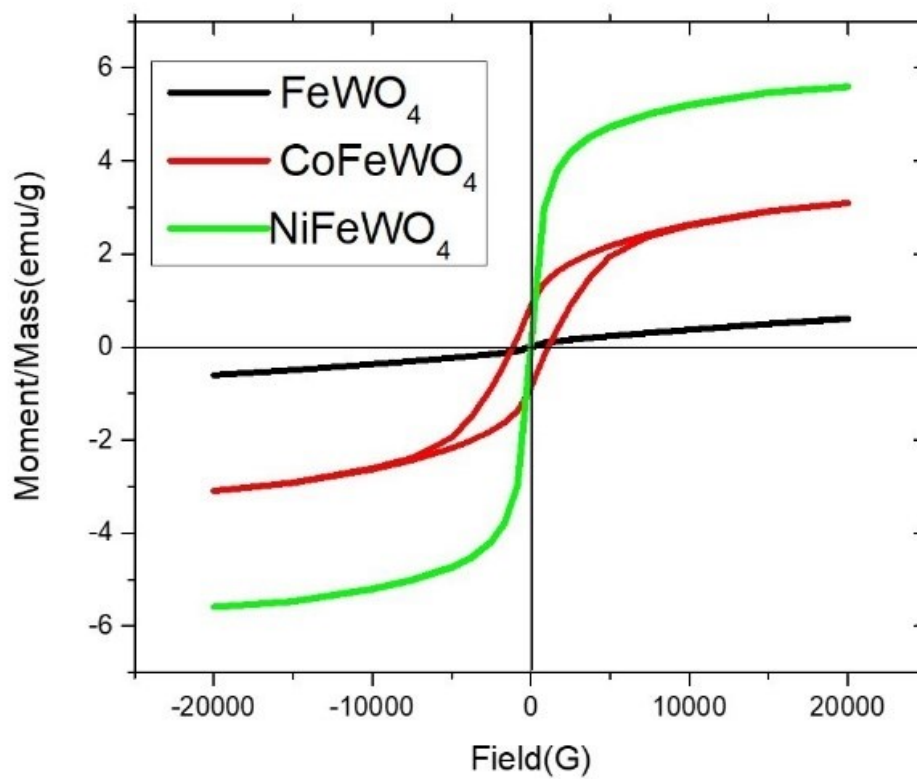

**Fig. S2.** VSM of FeWO<sub>4</sub>, CoFeWO<sub>4</sub> and NiFeWO<sub>4</sub> thin film.

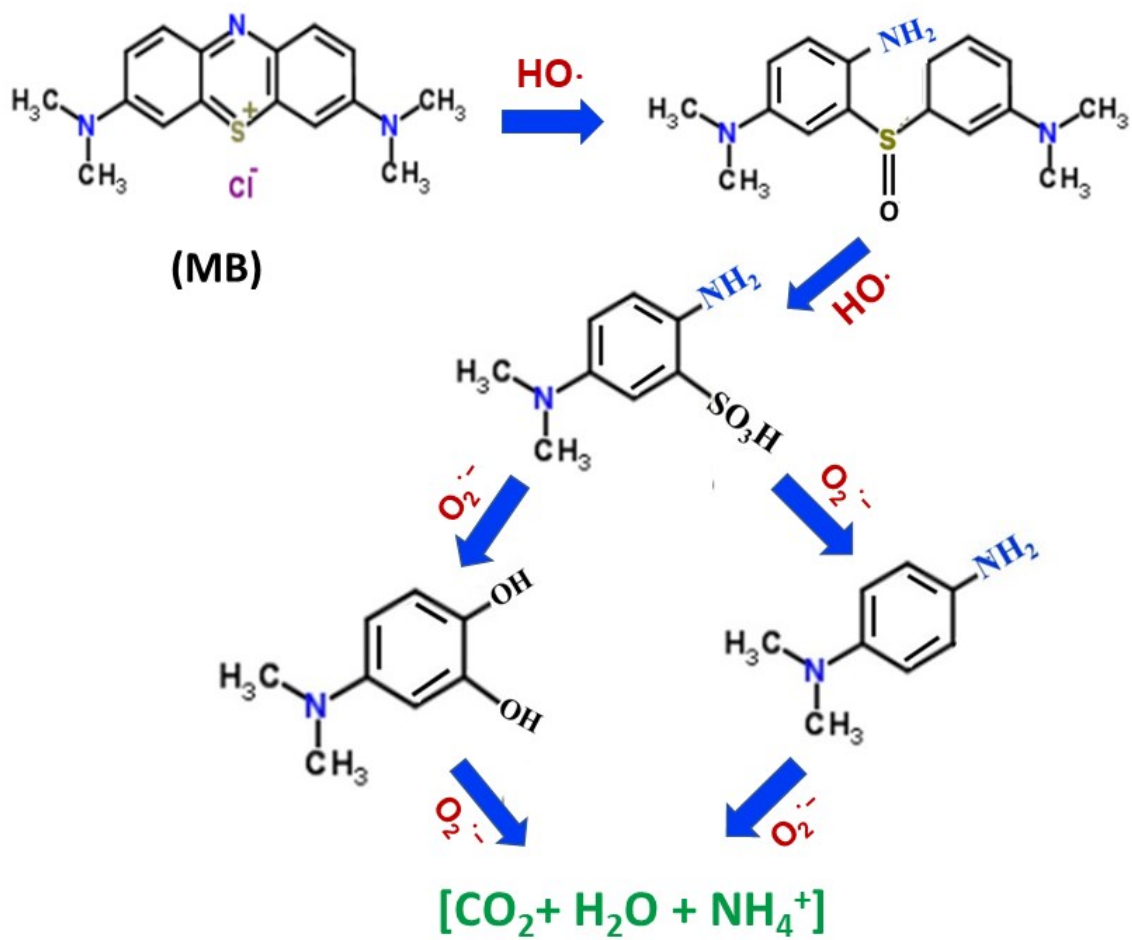

Fig. S3. MB degradation by generated  $\cdot\text{OH}$  and  $\text{O}_2^{\cdot-}$  radicals.

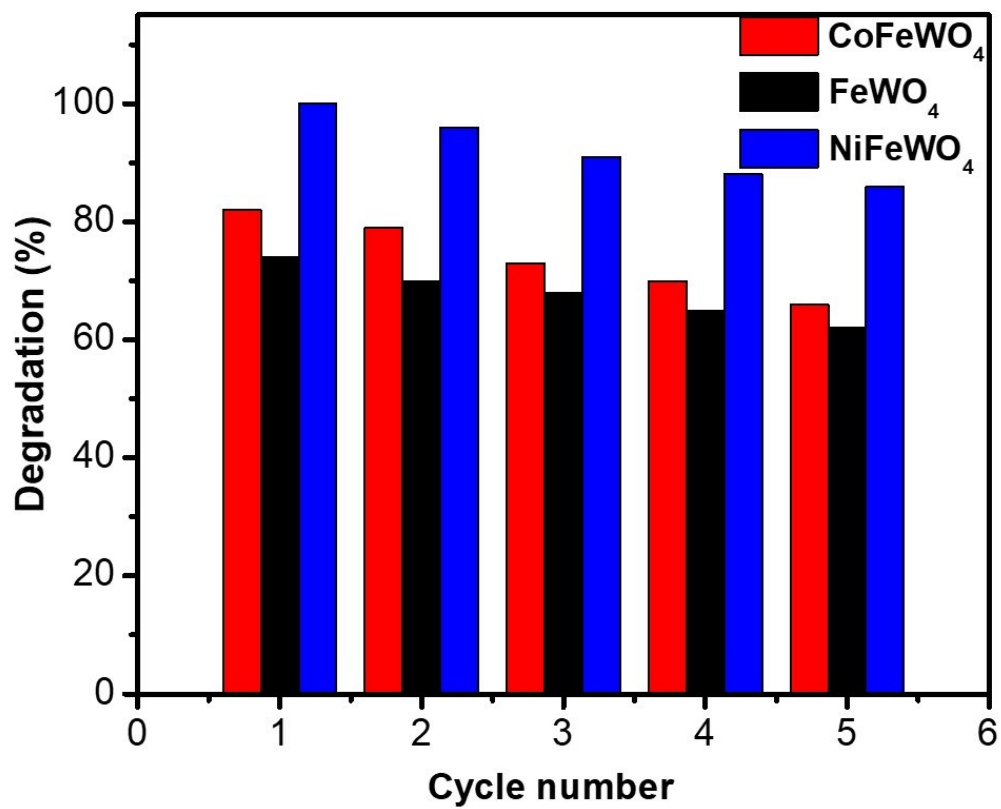

**Fig. S4.** Recycling experiment of FeWO<sub>4</sub>, CoFeWO<sub>4</sub>, and NiFeWO<sub>4</sub> samples on the photodegradation MB.

**Table S1.** Molar ratios of chemicals mandatory for the different metal tungstate precursors to be prepared.

| Compound                                               | Assigned as | Metal ion salt (mole)/ Isooctane/water/AOT | Mixed Reactant | Molar ratio | Assigned as         | Heat treatment temperature (°C) | Heat treatment Time (hr) |
|--------------------------------------------------------|-------------|--------------------------------------------|----------------|-------------|---------------------|---------------------------------|--------------------------|
| (Na <sub>2</sub> WO <sub>4</sub> ·2H <sub>2</sub> O)   | Reactant A  | 0.1/25/25/0.1                              | A:B            | 1:1.2       | FeWO <sub>4</sub>   | 600/2°C/min                     | 6                        |
| (Fe(NO <sub>3</sub> ) <sub>2</sub> )                   | Reactant B  | 0.1 or 0.12/25/25/0.1                      | A:B            | 1:1         | FeWO <sub>4</sub>   | 600/2°C/min                     | 6                        |
| (Co(NO <sub>3</sub> ) <sub>2</sub> ·6H <sub>2</sub> O) | Reactant C  | 0.1:0.1/25/25/0.1                          | C:A:B          | 0.5:0.5:1   | CoFeWO <sub>4</sub> | 600/2°C/min                     | 6                        |
| (Ni(NO <sub>3</sub> ) <sub>2</sub> ·6H <sub>2</sub> O) | Reactant D  | 0.1/25/25/0.1                              | D:A:B          | 0.5:0.5:1   | NiFeWO <sub>4</sub> | 600/2°C/min                     | 6                        |

**Table S2.** Comparison of performance characteristics of MWO<sub>4</sub> photocatalysts for the degradation of different pollutants.

| Photocatalyst                                   | Target pollutant                     | Light illumination | Photocatalytic activity | degradation time | Reference           |
|-------------------------------------------------|--------------------------------------|--------------------|-------------------------|------------------|---------------------|
| NiFeWO <sub>4</sub>                             | MB                                   | UV                 | 100%                    | 60 min           | <i>Current work</i> |
| NiWO <sub>4</sub>                               | MO dye                               | UV                 | 87%                     | 100 min          | 1                   |
| ZnWO <sub>4</sub>                               | para-aminobenzoic acid               | UV-A               | 100 %                   | 160 min          | 2                   |
| ZnWO <sub>4</sub>                               | MB<br>Rh-B                           | UV                 | 100%                    | 60 min<br>25 min | 3                   |
| BaWO <sub>4</sub>                               | Methyl thioninium chloride (MTC) dye | UV                 | 75% at pH=10            | 30 min           | 4                   |
| CuWO <sub>4</sub>                               | MO                                   | UV                 | 75%                     | 90 min           | 5                   |
| Pr <sub>2</sub> (WO <sub>4</sub> ) <sub>3</sub> | MB                                   | UV                 | 99.9%                   | 60 min           | 6                   |
| CuWO <sub>4</sub> /ZnO                          | MB                                   | sunlight           | 98.9                    | 120 min          | 7                   |

## Supplementary references

1. S. M. Pourmortazavi, M. Rahimi-Nasrabadi, M. S. Karimi and S. Mirsadeghi, *New J. Chem.*, 2018, **42**, 19934-19944.
2. V. Faka, S. Tsoumachidou, M. Moschogiannaki, G. Kiriakidis, I. Poullos and V. Binas, *Journal of Photochemistry and Photobiology A: Chemistry*, **406**, 113002.
3. K. Garadkar, L. Ghule, K. Sapnar and S. Dhole, *Mater. Res. Bull.*, 2013, **48**, 1105-1109.
4. S. M. AlShehri, J. Ahmed, T. Ahamad, B. M. Almaswari and A. Khan, *J. Nanopart. Res.*, 2017, **19**, 289.
5. S. M. Hosseinpour-Mashkani and A. Sobhani-Nasab, *Journal of Materials Science: Materials in Electronics*, 2016, **27**, 7548-7553.
6. S. M. Pourmortazavi, M. Rahimi-Nasrabadi, M. R. Ganjali, M. S. Karimi, P. Norouzi and F. Faridbod, *Open Chemistry*, 2017, **15**, 129-138.
7. C. Chen, W. Bi, Z. Xia, W. Yuan and L. Li, *ACS Omega*, 2020.
